# Supplementary material for: Neuroinflammatory Consequences of Rhinovirus Infection in Human Epithelial and Neuronal Models
Source: Lung. 2025 Sep 7;203(1):93. doi: 10.1007/s00408-025-00846-y (PMC12414851; doi:10.1007/s00408-025-00846-y)
Supplement: Supplementary file 1 — Supplementary file1 (XLSX 28 KB) [file 408_2025_846_MOESM1_ESM.xlsx]

## Sheet: Reactome analysis
Reactome analysis results
Pathway identifier	Pathway name	#Entities found	#Entities total	#Interactors found	#Interactors total	Entities ratio	Entities pValue	Entities FDR	#Reactions found	#Reactions total	Reactions ratio	Species identifier	Species name	Submitted entities found	Submitted entities hit interactor	Interacts with	Found reaction identifiers
R-HSA-6785470	tRNA processing in the mitochondrion	4	45	0	5	0.00285352	5.4632e-05	0.046765	3	3	0.00019658	9606	Homo sapiens	MT-ND6;MT-TP;MT-TL1;MT-TF			R-HSA-6786854;R-HSA-6786881;R-HSA-6785722
R-HSA-442982	Ras activation upon Ca2+ influx through NMDA receptor	2	27	0	0	0.00171211	0.00563869	0.66025	2	2	0.000131053	9606	Homo sapiens	CAMK2D			R-HSA-442732;R-HSA-442760
R-HSA-9617324	Negative regulation of NMDA receptor-mediated neuronal transmission	2	27	0	4	0.00171211	0.0073547	0.66025	2	4	0.000262106	9606	Homo sapiens	CAMK2D			R-HSA-9619449;R-HSA-9617326
R-HSA-442742	CREB1 phosphorylation through NMDA receptor-mediated activation of RAS signaling	2	39	0	0	0.00247305	0.0113965	0.66025	2	7	0.000458686	9606	Homo sapiens	CAMK2D			R-HSA-442732;R-HSA-442760
R-HSA-438066	Unblocking of NMDA receptors, glutamate binding and activation	2	27	0	15	0.00171211	0.0131128	0.66025	5	5	0.000327633	9606	Homo sapiens	CAMK2D			R-HSA-432164;R-HSA-438037;R-HSA-432162;R-HSA-432172;R-HSA-9614185
R-HSA-5576892	Phase 0 - rapid depolarisation	2	34	0	23	0.00215599	0.0232154	0.66025	1	2	0.000131053	9606	Homo sapiens	CAMK2D;RANGRF			R-HSA-5576895
R-HSA-3371571	HSF1-dependent transactivation	2	59	0	0	0.00374128	0.0247427	0.66025	5	8	0.000524212	9606	Homo sapiens	CAMK2D;DNAJB6			R-HSA-3371554;R-HSA-5082356;R-HSA-5082369;R-HSA-5082384;R-HSA-5082387
R-HSA-72306	tRNA processing	4	182	0	106	0.0115409	0.0298275	0.66025	3	54	0.00353843	9606	Homo sapiens	MT-ND6;MT-TP;MT-TL1;MT-TF			R-HSA-6786854;R-HSA-6786881;R-HSA-6785722
R-HSA-9683612	Maturation of protein M	0	2	1	7	0.000126823	0.036217	0.66025	3	3	0.00019658	9606	Homo sapiens		DDX58	P59596	R-HSA-9683751;R-HSA-9683734;R-HSA-9683718
R-HSA-428890	Role of ABL in ROBO-SLIT signaling	1	10	0	0	0.000634115	0.04016	0.66025	4	4	0.000262106	9606	Homo sapiens	ABL2			R-HSA-428885;R-HSA-428883;R-HSA-376141;R-HSA-428888
R-HSA-8852405	Signaling by MST1	1	8	0	4	0.000507292	0.0440871	0.66025	1	4	0.000262106	9606	Homo sapiens	SPINT2			R-HSA-6800198
R-HSA-9679509	Virion Assembly and Release	0	7	1	9	0.000443881	0.0479983	0.66025	1	8	0.000524212	9606	Homo sapiens		DDX58	P59596	R-HSA-9684218

## Sheet: Toppgene analysis
Toppgene analysis results
Category	ID	Name	Source	p-value	q-value Bonferroni	q-value FDR B&H	q-value FDR B&Y	Hit Count in Query List	Hit Count in Genome	Hit in Query List
GO: Molecular Function	GO:0030533	triplet codon-amino acid adaptor activity		0.0001132	0.03238	0.03238	0.2019	3	29	MT-TF,MT-TL1,MT-TP
GO: Biological Process	GO:0022408	negative regulation of cell-cell adhesion		1.576e-05	0.03044	0.0245	0.1996	7	252	ABL2,SPINT2,AKNA,CD74,CBLB,EPCAM,LAPTM5
GO: Biological Process	GO:0007162	negative regulation of cell adhesion		2.537e-05	0.04901	0.0245	0.1996	8	375	ABL2,SPINT2,CD164,AKNA,CD74,CBLB,EPCAM,LAPTM5
GO: Cellular Component	GO:0098683	cochlear hair cell ribbon synapse		0.0001461	0.03433	0.03433	0.2073	2	6	MYO6,CAMK2D
Human Phenotype	HP:0025268	Stuttering		4.49e-06	0.007727	0.007163	0.05751	4	25	UBAP2L,MT-ND6,MT-TF,MT-TL1
Human Phenotype	HP:0001427	Mitochondrial inheritance		8.324e-06	0.01433	0.007163	0.05751	4	29	MT-ND6,MT-TF,MT-TL1,MT-TP
Human Phenotype	HP:0003200	Ragged-red muscle fibers		1.81e-05	0.03114	0.009711	0.07796	5	73	DGUOK,MT-ND6,MT-TF,MT-TL1,MT-TP
Human Phenotype	HP:0001045	Vitiligo		2.257e-05	0.03884	0.009711	0.07796	4	37	MT-ND6,MT-TF,MT-TL1,CBLB
Human Phenotype	HP:0000590	Progressive external ophthalmoplegia		3.765e-05	0.0648	0.01296	0.1041	4	42	DGUOK,MT-ND6,MT-TF,MT-TL1
Human Phenotype	HP:0007327	Mixed demyelinating and axonal polyneuropathy		5.986e-05	0.103	0.01717	0.1378	3	17	MT-ND6,MT-TF,MT-TL1
Human Phenotype	HP:0003800	Muscle abnormality related to mitochondrial dysfunction		7.565e-05	0.1302	0.01809	0.1452	5	98	DGUOK,MT-ND6,MT-TF,MT-TL1,COA8
Human Phenotype	HP:0012766	Widened cerebral subarachnoid space		8.477e-05	0.1459	0.01809	0.1452	3	19	MT-ND6,MT-TF,MT-TL1
Human Phenotype	HP:0007067	Distal peripheral sensory neuropathy		9.942e-05	0.1711	0.01809	0.1452	3	20	MT-ND6,MT-TF,MT-TL1
Human Phenotype	HP:0005157	Concentric hypertrophic cardiomyopathy		0.0001156	0.199	0.01809	0.1452	3	21	MT-ND6,MT-TF,MT-TL1
Human Phenotype	HP:0007159	Fluctuations in consciousness		0.0001156	0.199	0.01809	0.1452	3	21	MT-ND6,MT-TF,MT-TL1
Human Phenotype	HP:0000408	Progressive sensorineural hearing impairment		0.0001267	0.2181	0.01818	0.1459	4	57	MYO6,MT-ND6,MT-TF,MT-TL1
Human Phenotype	HP:0012429	Aplasia/Hypoplasia of the cerebral white matter		0.0001975	0.3399	0.02451	0.1968	3	25	MT-ND6,MT-TF,MT-TL1
Human Phenotype	HP:0001730	Progressive hearing impairment		0.0001994	0.3432	0.02451	0.1968	4	64	MYO6,MT-ND6,MT-TF,MT-TL1
Human Phenotype	HP:0100027	Recurrent pancreatitis		0.0002226	0.3831	0.02554	0.205	3	26	MT-ND6,MT-TF,MT-TL1
Human Phenotype	HP:0100651	Type I diabetes mellitus		0.0002983	0.5134	0.03137	0.2519	4	71	MT-ND6,MT-TF,MT-TL1,CBLB
Human Phenotype	HP:0001345	Psychotic mentation		0.0003099	0.5334	0.03137	0.2519	3	29	MT-ND6,MT-TF,MT-TL1
Human Phenotype	HP:0000736	Short attention span		0.0003446	0.593	0.03261	0.2618	9	517	BUD23,UBAP2L,MT-ND6,KDM3B,MT-TF,CHD8,MT-TL1,NKAP,EPCAM
Human Phenotype	HP:0002401	Stroke-like episode		0.0003789	0.6521	0.03261	0.2618	3	31	MT-ND6,MT-TF,MT-TL1
Human Phenotype	HP:5200044	Reduced attention regulation		0.0003927	0.6758	0.03261	0.2618	9	526	BUD23,UBAP2L,MT-ND6,KDM3B,MT-TF,CHD8,MT-TL1,NKAP,EPCAM
Human Phenotype	HP:0000544	External ophthalmoplegia		0.0004077	0.7016	0.03261	0.2618	4	77	DGUOK,MT-ND6,MT-TF,MT-TL1
Human Phenotype	HP:0002331	Recurrent paroxysmal headache		0.0004168	0.7173	0.03261	0.2618	3	32	MT-ND6,MT-TF,MT-TL1
Human Phenotype	HP:0001716	Wolff-Parkinson-White syndrome		0.0004997	0.8601	0.03739	0.3002	3	34	MT-ND6,MT-TF,MT-TL1
Human Phenotype	HP:0002123	Generalized myoclonic seizure		0.0005261	0.9055	0.03773	0.3029	5	148	MT-ND6,MT-TF,MT-TL1,LNPK,MT-TP
Human Phenotype	HP:0004389	Intestinal pseudo-obstruction		0.0005926	1	0.03923	0.3149	3	36	MT-ND6,MT-TF,MT-TL1
Human Phenotype	HP:0010794	Impaired visuospatial constructive cognition		0.0005926	1	0.03923	0.3149	3	36	MT-ND6,MT-TF,MT-TL1
Human Phenotype	HP:0008619	Bilateral sensorineural hearing impairment		0.0006785	1	0.04325	0.3472	4	88	MT-ND6,MT-TF,MT-TL1,COA8
Human Phenotype	HP:0004309	Ventricular preexcitation		0.0007515	1	0.04619	0.3708	3	39	MT-ND6,MT-TF,MT-TL1
Disease	cv:C0162672	MERRF syndrome	Clinical Variations	1.065e-07	8.502e-05	4.251e-05	0.0003086	3	5	MT-TF,MT-TL1,MT-TP
Disease	545000	MYOCLONIC EPILEPSY ASSOCIATED WITH RAGGED-RED FIBERS	OMIM MedGen	1.065e-07	8.502e-05	4.251e-05	0.0003086	3	5	MT-TF,MT-TL1,MT-TP
Disease	C0162672	MERRF Syndrome	DisGeNET Curated	3.008e-06	0.002401	0.0007797	0.00566	3	13	MT-TF,MT-TL1,MT-TP
Disease	cv:C0751651	Mitochondrial disease	Clinical Variations	4.483e-06	0.003578	0.0007797	0.00566	4	49	DGUOK,MT-ND6,MT-TF,MT-TL1
Disease	cv:C0162671	Juvenile myopathy, encephalopathy, lactic acidosis AND stroke	Clinical Variations	5.862e-06	0.004678	0.0007797	0.00566	3	16	MT-ND6,MT-TF,MT-TL1
Disease	540000	MITOCHONDRIAL MYOPATHY, ENCEPHALOPATHY, LACTIC ACIDOSIS, AND STROKE-LIKE EPISODES	OMIM MedGen	5.862e-06	0.004678	0.0007797	0.00566	3	16	MT-ND6,MT-TF,MT-TL1
Disease	C0162671	MELAS Syndrome	DisGeNET Curated	1.597e-05	0.01274	0.00182	0.01321	3	22	MT-ND6,MT-TF,MT-TL1
Disease	cv:C0236038	Hereditary hearing loss and deafness	Clinical Variations	1.941e-05	0.01549	0.001936	0.01405	5	146	MYO6,DGUOK,MT-ND6,MT-TF,MT-TL1
Disease	C0557874	Global developmental delay	DisGeNET Curated	0.000229	0.1827	0.01733	0.1258	4	133	KDM3B,SPART,LNPK,NKAP
Disease	C2931092	Maternally Inherited Leigh Syndrome	DisGeNET Curated	0.0002675	0.2135	0.01733	0.1258	2	11	MT-ND6,MT-TL1
Disease	cv:CN043634	Mitochondrial DNA-Associated Leigh Syndrome and NARP	Clinical Variations	0.0004407	0.3517	0.01733	0.1258	2	14	MT-ND6,MT-TL1
Disease	MONDO_0004985	bipolar disorder	GWAS	0.001834	1	0.01733	0.1258	6	577	CNNM4,RASIP1,MKLN1,NT5C2,KDM3B,COA8
Disease	EFO_0004574, EFO_0008317, EFO_0008596	chylomicron measurement, total cholesterol measurement, very low density lipoprotein cholesterol measurement	GWAS	0.001945	1	0.01733	0.1258	3	110	BUD23,CMIP,MT-TP
Disease	cv:C5830600	Autoimmune disease, multisystem, infantile-onset, 3	Clinical Variations	0.002237	1	0.01733	0.1258	1	1	CBLB
Disease	cv:C3554373	Intellectual developmental disorder with autism and macrocephaly	Clinical Variations	0.002237	1	0.01733	0.1258	1	1	CHD8
Disease	613162	SPASTIC PARAPLEGIA 45, AUTOSOMAL RECESSIVE	OMIM MedGen	0.002237	1	0.01733	0.1258	1	1	NT5C2
Disease	cv:C3495589	Jalili syndrome	Clinical Variations	0.002237	1	0.01733	0.1258	1	1	CNNM4
Disease	C3151513	MITOCHONDRIAL DNA DEPLETION SYNDROME 3 (HEPATOCEREBRAL TYPE)	DisGeNET Curated	0.002237	1	0.01733	0.1258	1	1	DGUOK
Disease	C3554373	AUTISM, SUSCEPTIBILITY TO, 18	DisGeNET Curated	0.002237	1	0.01733	0.1258	1	1	CHD8
Disease	DOID:0050886 (is_implicated_in)	Troyer syndrome (is_implicated_in)	AllianceGenome	0.002237	1	0.01733	0.1258	1	1	SPART
Disease	C0302246	Hexadactyly	DisGeNET Curated	0.002237	1	0.01733	0.1258	1	1	SPINT2
Disease	cv:C4283893	Autosomal dominant nonsyndromic hearing loss 66	Clinical Variations	0.002237	1	0.01733	0.1258	1	1	CD164
Disease	618846	DIETS-JONGMANS SYNDROME	OMIM MedGen	0.002237	1	0.01733	0.1258	1	1	KDM3B
Disease	C4749942	Hypertrophic cardiomyopathy and renal tubular disease due to mitochondrial DNA mutation	DisGeNET Curated	0.002237	1	0.01733	0.1258	1	1	MT-TL1
Disease	DOID:0110587 (is_implicated_in)	autosomal dominant nonsyndromic deafness 66 (is_implicated_in)	AllianceGenome	0.002237	1	0.01733	0.1258	1	1	CD164
Disease	cv:C1843028	Autosomal recessive nonsyndromic hearing loss 37	Clinical Variations	0.002237	1	0.01733	0.1258	1	1	MYO6
Disease	C2750737	DIARRHEA 5, WITH TUFTING ENTEROPATHY, CONGENITAL	DisGeNET Curated	0.002237	1	0.01733	0.1258	1	1	EPCAM
Disease	cv:C4748137	Neurodevelopmental disorder with epilepsy and hypoplasia of the corpus callosum	Clinical Variations	0.002237	1	0.01733	0.1258	1	1	LNPK
Disease	DOID:0110797 (is_implicated_in)	hereditary spastic paraplegia 45 (is_implicated_in)	AllianceGenome	0.002237	1	0.01733	0.1258	1	1	NT5C2
Disease	C3501858	Muscular Dystrophy, Limb-Girdle, Type 1D	DisGeNET Curated	0.002237	1	0.01733	0.1258	1	1	DNAJB6
Disease	C1843028	Deafness, Autosomal Recessive 37	DisGeNET Curated	0.002237	1	0.01733	0.1258	1	1	MYO6
Disease	cv:C5441927	Congenital secretory sodium diarrhea 3	Clinical Variations	0.002237	1	0.01733	0.1258	1	1	SPINT2
Disease	301039	INTELLECTUAL DEVELOPMENTAL DISORDER, X-LINKED, SYNDROMIC, HACKMANN-DI DONATO TYPE	OMIM MedGen	0.002237	1	0.01733	0.1258	1	1	NKAP
Disease	C4275062	Intestinal epithelial dysplasia	DisGeNET Curated	0.002237	1	0.01733	0.1258	1	1	SPINT2
Disease	619775	CONGENITAL DISORDER OF DEGLYCOSYLATION 2	OMIM MedGen	0.002237	1	0.01733	0.1258	1	1	MAN2C1
Disease	C0274869	Toxic effect of heavy metal	DisGeNET Curated	0.002237	1	0.01733	0.1258	1	1	KDM3B
Disease	C2750471	COLORECTAL CANCER, HEREDITARY NONPOLYPOSIS, TYPE 8	DisGeNET Curated	0.002237	1	0.01733	0.1258	1	1	EPCAM
Disease	DOID:8488 (is_marker_for)	polyhydramnios (is_marker_for)	AllianceGenome	0.002237	1	0.01733	0.1258	1	1	LNPEP
Disease	620430	AUTOIMMUNE DISEASE, MULTISYSTEM, INFANTILE-ONSET, 3	OMIM MedGen	0.002237	1	0.01733	0.1258	1	1	CBLB
Disease	DOID:1790 (biomarker_via_orthology)	malignant mesothelioma (biomarker_via_orthology)	AllianceGenome	0.002237	1	0.01733	0.1258	1	1	MCAM
Disease	cv:CN305369	Portal hypertension, noncirrhotic, 1	Clinical Variations	0.002237	1	0.01733	0.1258	1	1	DGUOK
Disease	cv:C5436718	Mitochondrial complex 4 deficiency, nuclear type 17	Clinical Variations	0.002237	1	0.01733	0.1258	1	1	COA8
Disease	cv:C5774293	Inflammatory poikiloderma with hair abnormalities and acral keratoses	Clinical Variations	0.002237	1	0.01733	0.1258	1	1	LTV1
Disease	620494	NEURODEVELOPMENTAL DISORDER WITH IMPAIRED LANGUAGE, BEHAVIORAL ABNORMALITIES, AND DYSMORPHIC FACIES	OMIM MedGen	0.002237	1	0.01733	0.1258	1	1	UBAP2L
Disease	DOID:0111404 (is_implicated_in)	Jalili syndrome (is_implicated_in)	AllianceGenome	0.002237	1	0.01733	0.1258	1	1	CNNM4
Disease	DOID:0110552 (implicated_via_orthology)	autosomal dominant nonsyndromic deafness 22 (implicated_via_orthology)	AllianceGenome	0.002237	1	0.01733	0.1258	1	1	MYO6
Disease	DOID:0060776 (is_implicated_in)	congenital diarrhea 5 with tufting enteropathy (is_implicated_in)	AllianceGenome	0.002237	1	0.01733	0.1258	1	1	EPCAM
Disease	DOID:0110495 (is_implicated_in)	autosomal recessive nonsyndromic deafness 37 (is_implicated_in)	AllianceGenome	0.002237	1	0.01733	0.1258	1	1	MYO6
Disease	617068	PORTAL HYPERTENSION, NONCIRRHOTIC, 1	OMIM MedGen	0.002237	1	0.01733	0.1258	1	1	DGUOK
Disease	617070	PROGRESSIVE EXTERNAL OPHTHALMOPLEGIA WITH MITOCHONDRIAL DNA DELETIONS, AUTOSOMAL RECESSIVE 4	OMIM MedGen	0.002237	1	0.01733	0.1258	1	1	DGUOK
Disease	217080	JALILI SYNDROME	OMIM MedGen	0.002237	1	0.01733	0.1258	1	1	CNNM4
Disease	cv:C2750737	Congenital diarrhea 5 with tufting enteropathy	Clinical Variations	0.002237	1	0.01733	0.1258	1	1	EPCAM
Disease	619061	MITOCHONDRIAL COMPLEX IV DEFICIENCY, NUCLEAR TYPE 17	OMIM MedGen	0.002237	1	0.01733	0.1258	1	1	COA8
Disease	cv:C5191055	Mitochondrial DNA depletion syndrome 3 (hepatocerebral type)	Clinical Variations	0.002237	1	0.01733	0.1258	1	1	DGUOK
Disease	C3495589	Jalili syndrome	DisGeNET Curated	0.002237	1	0.01733	0.1258	1	1	CNNM4
Disease	DOID:0111516 (is_implicated_in)	autosomal recessive progressive external ophthalmoplegia with mitochondrial DNA deletions 4 (is_implicated_in)	AllianceGenome	0.002237	1	0.01733	0.1258	1	1	DGUOK
Disease	614419		OMIM MedGen	0.002237	1	0.01733	0.1258	1	1	GOT1
Disease	cv:C3280741	Aspartate aminotransferase, serum level of, quantitative trait locus 1	Clinical Variations	0.002237	1	0.01733	0.1258	1	1	GOT1
Disease	OBA_2041632	level of alpha-(1,3)-fucosyltransferase 10 in blood serum	GWAS	0.002237	1	0.01733	0.1258	1	1	FUT10
Disease	C0344482	Hypoplasia of corpus callosum	DisGeNET Curated	0.002237	1	0.01733	0.1258	1	1	LNPK
Disease	603511	MUSCULAR DYSTROPHY, LIMB-GIRDLE, AUTOSOMAL DOMINANT 1	OMIM MedGen	0.002237	1	0.01733	0.1258	1	1	DNAJB6
Disease	613244	LYNCH SYNDROME 8	OMIM MedGen	0.002237	1	0.01733	0.1258	1	1	EPCAM
Disease	DOID:0110495 (implicated_via_orthology)	autosomal recessive nonsyndromic deafness 37 (implicated_via_orthology)	AllianceGenome	0.002237	1	0.01733	0.1258	1	1	MYO6
Disease	C4721885	MUSCULAR DYSTROPHY, LIMB-GIRDLE, AUTOSOMAL DOMINANT 1	DisGeNET Curated	0.002237	1	0.01733	0.1258	1	1	DNAJB6
Disease	C0393559	Troyer syndrome	DisGeNET Curated	0.002237	1	0.01733	0.1258	1	1	SPART
Disease	616969	DEAFNESS, AUTOSOMAL DOMINANT 66	OMIM MedGen	0.002237	1	0.01733	0.1258	1	1	CD164
Disease	613217	DIARRHEA 5, WITH TUFTING ENTEROPATHY, CONGENITAL	OMIM MedGen	0.002237	1	0.01733	0.1258	1	1	EPCAM
Disease	cv:C5393302	Intellectual developmental disorder, X-linked, syndromic, Hackmann-Di Donato type	Clinical Variations	0.002237	1	0.01733	0.1258	1	1	NKAP
Disease	DOID:0080121 (is_implicated_in)	mitochondrial DNA depletion syndrome 3 (is_implicated_in)	AllianceGenome	0.002237	1	0.01733	0.1258	1	1	DGUOK
Disease	cv:C4721885	Autosomal dominant limb-girdle muscular dystrophy type 1D (DNAJB6)	Clinical Variations	0.002237	1	0.01733	0.1258	1	1	DNAJB6
Disease	cv:C3888209	Hereditary spastic paraplegia 45	Clinical Variations	0.002237	1	0.01733	0.1258	1	1	NT5C2
Disease	C2931767	Deafness, autosomal dominant nonsyndromic sensorineural 22	DisGeNET Curated	0.002237	1	0.01733	0.1258	1	1	MYO6
Disease	DOID:0060781 (is_implicated_in)	congenital secretory sodium diarrhea 3 (is_implicated_in)	AllianceGenome	0.002237	1	0.01733	0.1258	1	1	SPINT2
Disease	cv:C0393559	Troyer syndrome	Clinical Variations	0.002237	1	0.01733	0.1258	1	1	SPART
Disease	251880	MITOCHONDRIAL DNA DEPLETION SYNDROME 3 (HEPATOCEREBRAL TYPE)	OMIM MedGen	0.002237	1	0.01733	0.1258	1	1	DGUOK
Disease	607821	DEAFNESS, AUTOSOMAL RECESSIVE 37	OMIM MedGen	0.002237	1	0.01733	0.1258	1	1	MYO6
Disease	cv:C4310733	Progressive external ophthalmoplegia with mitochondrial DNA deletions, autosomal recessive 4	Clinical Variations	0.002237	1	0.01733	0.1258	1	1	DGUOK
Disease	DOID:0110552 (is_implicated_in)	autosomal dominant nonsyndromic deafness 22 (is_implicated_in)	AllianceGenome	0.002237	1	0.01733	0.1258	1	1	MYO6
Disease	C1857588	Amaurosis hypertrichosis	DisGeNET Curated	0.002237	1	0.01733	0.1258	1	1	CNNM4
Disease	615032	INTELLECTUAL DEVELOPMENTAL DISORDER WITH AUTISM AND MACROCEPHALY	OMIM MedGen	0.002237	1	0.01733	0.1258	1	1	CHD8
Disease	DOID:0060776 (implicated_via_orthology)	congenital diarrhea 5 with tufting enteropathy (implicated_via_orthology)	AllianceGenome	0.002237	1	0.01733	0.1258	1	1	EPCAM
Disease	cv:C2931767	Autosomal dominant nonsyndromic hearing loss 22	Clinical Variations	0.002237	1	0.01733	0.1258	1	1	MYO6
Disease	DOID:0070270 (is_implicated_in)	hereditary nonpolyposis colorectal cancer type 8 (is_implicated_in)	AllianceGenome	0.002237	1	0.01733	0.1258	1	1	EPCAM
Disease	606346	DEAFNESS, AUTOSOMAL DOMINANT 22	OMIM MedGen	0.002237	1	0.01733	0.1258	1	1	MYO6
Disease	C4310735	PORTAL HYPERTENSION, NONCIRRHOTIC	DisGeNET Curated	0.002237	1	0.01733	0.1258	1	1	DGUOK
Disease	cv:C5676931	Congenital disorder of deglycosylation 2	Clinical Variations	0.002237	1	0.01733	0.1258	1	1	MAN2C1
Disease	C4310733	PROGRESSIVE EXTERNAL OPHTHALMOPLEGIA WITH MITOCHONDRIAL DNA DELETIONS, AUTOSOMAL RECESSIVE 4	DisGeNET Curated	0.002237	1	0.01733	0.1258	1	1	DGUOK
Disease	DOID:0110305 (is_implicated_in)	autosomal dominant limb-girdle muscular dystrophy type 1 (is_implicated_in)	AllianceGenome	0.002237	1	0.01733	0.1258	1	1	DNAJB6
Disease	cv:C2750471	Lynch syndrome 8	Clinical Variations	0.002237	1	0.01733	0.1258	1	1	EPCAM
Disease	C3888209	SPASTIC PARAPLEGIA 45, AUTOSOMAL RECESSIVE	DisGeNET Curated	0.002237	1	0.01733	0.1258	1	1	NT5C2
Disease	C2931074	Cone rod dystrophy amelogenesis imperfecta	DisGeNET Curated	0.002237	1	0.01733	0.1258	1	1	CNNM4
Disease	C4310935	MITOCHONDRIAL DNA DEPLETION SYNDROME 3	DisGeNET Curated	0.002237	1	0.01733	0.1258	1	1	DGUOK
Disease	cv:C5394263	Diets-Jongmans syndrome	Clinical Variations	0.002237	1	0.01733	0.1258	1	1	KDM3B
Disease	618090	NEURODEVELOPMENTAL DISORDER WITH EPILEPSY AND HYPOPLASIA OF THE CORPUS CALLOSUM	OMIM MedGen	0.002237	1	0.01733	0.1258	1	1	LNPK
Disease	cv:C5882686	Neurodevelopmental disorder with impaired language, behavioral abnormalities, and dysmorphic facies	Clinical Variations	0.002237	1	0.01733	0.1258	1	1	UBAP2L
Disease	DOID:0050886 (implicated_via_orthology)	Troyer syndrome (implicated_via_orthology)	AllianceGenome	0.002237	1	0.01733	0.1258	1	1	SPART
Disease	C3149009	DEAFNESS, AUTOSOMAL DOMINANT 22, WITH HYPERTROPHIC CARDIOMYOPATHY	DisGeNET Curated	0.002237	1	0.01733	0.1258	1	1	MYO6
Disease	C4283893	DEAFNESS, AUTOSOMAL DOMINANT 66	DisGeNET Curated	0.002237	1	0.01733	0.1258	1	1	CD164
Disease	C4748137	NEURODEVELOPMENTAL DISORDER WITH EPILEPSY AND HYPOPLASIA OF THE CORPUS CALLOSUM	DisGeNET Curated	0.002237	1	0.01733	0.1258	1	1	LNPK
Disease	275900	SPASTIC PARAPLEGIA 20, AUTOSOMAL RECESSIVE	OMIM MedGen	0.002237	1	0.01733	0.1258	1	1	SPART
Disease	620199	INFLAMMATORY POIKILODERMA WITH HAIR ABNORMALITIES AND ACRAL KERATOSES	OMIM MedGen	0.002237	1	0.01733	0.1258	1	1	LTV1
Disease	EFO_0020220	calcium/calmodulin-dependent protein kinase type II subunit delta measurement	GWAS	0.002237	1	0.01733	0.1258	1	1	CAMK2D
Disease	270420	DIARRHEA 3, SECRETORY SODIUM, CONGENITAL, WITH OR WITHOUT OTHER CONGENITAL ANOMALIES	OMIM MedGen	0.002237	1	0.01733	0.1258	1	1	SPINT2
Disease	DOID:10273 (implicated_via_orthology)	heart conduction disease (implicated_via_orthology)	AllianceGenome	0.00234	1	0.01796	0.1304	2	32	CAMK2D,PYGO1
Disease	EFO_0009264, EFO_0010724	lifestyle measurement, maximum cigarettes per day measurement	GWAS	0.00261	1	0.01984	0.144	3	122	CMIP,DSEL,PDZRN3
Disease	C3714756	Intellectual Disability	DisGeNET Curated	0.003267	1	0.0246	0.1786	5	447	NT5C2,KDM3B,CHD8,LNPK,NKAP
Disease	EFO_0020386	fibroblast growth factor 8 isoform b measurement	GWAS	0.004469	1	0.02947	0.214	1	2	NELFE
Disease	MONDO_0011599	birdshot chorioretinopathy	GWAS	0.004469	1	0.02947	0.214	1	2	LNPEP
Disease	C0751872	Immune Disorders, Nervous System	DisGeNET Curated	0.004469	1	0.02947	0.214	1	2	MCAM
Disease	C0751871	Autoimmune Diseases of the Nervous System	DisGeNET Curated	0.004469	1	0.02947	0.214	1	2	MCAM
Disease	C3148763	MUSCULAR DYSTROPHY, LIMB-GIRDLE, TYPE 1E	DisGeNET Curated	0.004469	1	0.02947	0.214	1	2	DNAJB6
Disease	C0029125	Optic Atrophies, Hereditary	DisGeNET Curated	0.004469	1	0.02947	0.214	1	2	MT-ND6
Disease	EFO_0801566	endoplasmic reticulum aminopeptidase 2 measurement	GWAS	0.004469	1	0.02947	0.214	1	2	LNPEP
Disease	C1839040	LEBER OPTIC ATROPHY AND DYSTONIA	DisGeNET Curated	0.004469	1	0.02947	0.214	1	2	MT-ND6
Disease	DOID:705 (implicated_via_orthology)	Leber hereditary optic neuropathy (implicated_via_orthology)	AllianceGenome	0.004469	1	0.02947	0.214	1	2	MT-ND6
Disease	DOID:0070350 (is_implicated_in)	spinal muscular atrophy with lower extremity predominant 2B (is_implicated_in)	AllianceGenome	0.004469	1	0.02947	0.214	1	2	MT-ND6
Disease	C0024748	alpha-Mannosidosis	DisGeNET Curated	0.004469	1	0.02947	0.214	1	2	MAN2C1
Disease	C3711385	Deoxyguanosine Kinase Deficiency	DisGeNET Curated	0.004469	1	0.02947	0.214	1	2	DGUOK
Disease	cv:C4310735	Portal hypertension, noncirrhotic	Clinical Variations	0.004469	1	0.02947	0.214	1	2	DGUOK
Disease	DOID:0080121 (implicated_via_orthology)	mitochondrial DNA depletion syndrome 3 (implicated_via_orthology)	AllianceGenome	0.004469	1	0.02947	0.214	1	2	DGUOK
Disease	cv:C3808991	Congenital disorder of deglycosylation	Clinical Variations	0.004469	1	0.02947	0.214	1	2	MAN2C1
Disease	C0026769	Multiple Sclerosis	DisGeNET Curated	0.004585	1	0.02975	0.2159	2	45	MCAM,CBLB
Disease	C0751324	Multiple Sclerosis, Acute Fulminating	DisGeNET Curated	0.004585	1	0.02975	0.2159	2	45	MCAM,CBLB
Disease	C0024668	Mammary Neoplasms, Experimental	DisGeNET Curated	0.005107	1	0.03287	0.2386	3	155	SPINT2,LNPEP,EPCAM
Disease	C0021400	Influenza	DisGeNET Curated	0.006079	1	0.03881	0.2818	2	52	APOL6,IFIT3
Disease	C0267663	Congenital secretory diarrhea, sodium type (disorder)	DisGeNET Curated	0.006696	1	0.03929	0.2852	1	3	SPINT2
Disease	C2931459	Lynch syndrome I (site-specific colonic cancer)	DisGeNET Curated	0.006696	1	0.03929	0.2852	1	3	EPCAM
Disease	EFO_0803233	unconventional myosin-VI measurement	GWAS	0.006696	1	0.03929	0.2852	1	3	MYO6
Disease	DOID:700 (is_implicated_in)	mitochondrial metabolism disease (is_implicated_in)	AllianceGenome	0.006696	1	0.03929	0.2852	1	3	DGUOK
Disease	EFO_0021847	pigment epithelium-derived factor measurement	GWAS	0.006696	1	0.03929	0.2852	1	3	SMYD4
Disease	C0342289	Diabetes-deafness syndrome maternally transmitted (disorder)	DisGeNET Curated	0.006696	1	0.03929	0.2852	1	3	MT-TL1
Disease	C4304725	Leber plus disease	DisGeNET Curated	0.006696	1	0.03929	0.2852	1	3	MT-ND6
Disease	EFO_0000714, EFO_0003060	survival time, non-small cell lung carcinoma	GWAS	0.006696	1	0.03929	0.2852	1	3	CAMK2D
Disease	EFO_0801366	alpha-(1,3)-fucosyltransferase 10 measurement	GWAS	0.006696	1	0.03929	0.2852	1	3	FUT10
Disease	EFO_0803315	carbonyl reductase [NADPH] 3 measurement	GWAS	0.006696	1	0.03929	0.2852	1	3	DOP1B
Disease	EFO_0802993	ras-related protein Rab-27B measurement	GWAS	0.006696	1	0.03929	0.2852	1	3	NELFE
Disease	EFO_0010699	diffuse plaque measurement	GWAS	0.006934	1	0.04039	0.2932	6	758	CMIP,CAMK2D,DNAJB6,LNPK,CBLB,RNF157
Disease	EFO_0004629	von Willebrand factor measurement	GWAS	0.00702	1	0.04059	0.2947	2	56	NELFE,REXO4
Disease	EFO_0021536	irritable bowel syndrome symptom measurement	GWAS	0.007514	1	0.04314	0.3132	2	58	DOP1B,LAPTM5
Disease	C0023893	Liver Cirrhosis, Experimental	DisGeNET Curated	0.007649	1	0.0436	0.3165	6	774	CAMK2D,CD74,EPCAM,PDZRN3,GOT1,LAPTM5
Disease	C0032045	Placenta Disorders	DisGeNET Curated	0.008918	1	0.04841	0.3514	1	4	SPINT2
Disease	cv:C4310690	Mitochondrial DNA depletion syndrome 15 (hepatocerebral type)	Clinical Variations	0.008918	1	0.04841	0.3514	1	4	DGUOK
Disease	EFO_0008012	Abelson tyrosine-protein kinase 2 measurement	GWAS	0.008918	1	0.04841	0.3514	1	4	ABL2
Disease	DOID:0060309 (is_implicated_in)	syndromic X-linked intellectual disability (is_implicated_in)	AllianceGenome	0.008918	1	0.04841	0.3514	1	4	NKAP
Disease	EFO_0021124	guanosine measurement	GWAS	0.008918	1	0.04841	0.3514	1	4	CAMK2D
Disease	C0010398	Cruveilhier-Baumgarten Syndrome	DisGeNET Curated	0.008918	1	0.04841	0.3514	1	4	DGUOK
Disease	DOID:9120 (is_implicated_in)	amyloidosis (is_implicated_in)	AllianceGenome	0.008918	1	0.04841	0.3514	1	4	GOT1
